## Correction: Specificity and Evolvability in Eukaryotic Protein Interaction Networks

Pedro Beltrao, Luis Serrano

doi:10.1371/journal.pcbi.0030025

In *PLoS Computational Biology*, volume 3, issue 2:

The set of four equations in the Materials and Methods section had three extra minus signs, which were incorrect. The following are the correct equations.

$$r_{(H.sapiens)} = 9 \times 10^{-7}k - 9 \times 10^{-7}$$

$$r_{(D.melanogaster)} = 4 \times 10^{-6}k - 2 \times 10^{-6}$$

$$r_{(C.elegans)} = 4 \times 10^{-6}k - 7 \times 10^{-7}$$

$$r_{(S.cerevisiae)} = 3 \times 10^{-6}k - 2 \times 10^{-6}$$

This correction note may be found online at doi:10.1371/journal.pcbi.0030070.

Published March 30, 2007.

Citation: (2007) Correction: Specificity and evolvability in eukaryotic protein interaction networks. *PLoS Comput Biol* 3(3): e70. doi:10.1371/journal.pcbi.0030070
